# Supplementary material
Source: MDPI journal article supplement (https://www.mdpi.com/2311-5637/9/7/670)
Supplement: s1 [file s1]

Table S1 GC-MS analysis results of aroma compounds in different Hurood samples

| RI            |      |       | Compound               | Concentration (µg/kg) |          |          |          |          |          |         |          |         |         |
|---------------|------|-------|------------------------|-----------------------|----------|----------|----------|----------|----------|---------|----------|---------|---------|
| Cal           | Ref  | RT    |                        | (U1)                  | (U2)     | (U3)     | (X4)     | (B1)     | (B2)     | (B3)    | (X1)     | (X2)    | (X3)    |
| Acids         |      |       |                        |                       |          |          |          |          |          |         |          |         |         |
| 1438          | 1435 | 21.71 | Acetic acid            | 1295.00               | 17997.00 | 16443.00 | 14812.00 | 861.00   | 175.00   | 1981.00 | 175.00   | 945.00  | 1036.00 |
| 1618          | 1630 | 28.83 | Butanoic acid          | 397.70                | 356.70   | 1090.60  | 1504.70  | 549.40   | 451.00   | 369.00  | 561.70   | 90.20   | 254.20  |
| 1661          | -    | 29.14 | 3-methyl-Butanoic acid | -                     | -        | -        | -        | -        | -        | -       | -        | 14.36   | 38.00   |
| 1729          | -    | 32.89 | Pentanoic acid         | -                     | -        | -        | -        | -        | -        | -       | 641.60   | 157.853 | 233.49  |
| 1836          | 1833 | 36.83 | Hexanoic acid          | 2567.25               | 3116.25  | 4873.50  | 6948.00  | 1296.00  | 1064.25  | 2202.75 | 4005.00  | 1030.50 | 1642.50 |
| 1950          | 1943 | 39.96 | Heptanoic acid         | 72.11                 | 139.16   | 71.62    | 261.40   | 71.62    | 27.04    | 13.57   | 98.48    | 44.76   | 85.94   |
| 2054          | 2055 | 42.00 | Octanoic acid          | 5382.50               | 3610.00  | 8280.00  | 10835.00 | 2387.50  | 2647.50  | 2552.50 | -        | 4057.50 | 2235.00 |
| 2415          | 2417 | 46.99 | Benzoic acid           | 132.88                | 308.29   | 330.31   | 1103.93  | -        | 3352.66  | -       | 1695.57  | 249.90  | 188.10  |
| 2160          | 2157 | 43.53 | Nonanoic acid          | 126.45                | -        | 38.12    | 523.86   | 38.12    | -        | 864.80  | 114.36   | 60.99   | 1263.94 |
| 2269          | 2268 | 44.84 | n-Decanoic acid        | 7062.00               | 3190.00  | 2464.00  | 5412.00  | 1298.00  | 12298.00 | 8998.00 | 5610.00  | 4334.00 | 2442.00 |
| 2330          | 2328 | 44.81 | Decenoic acid          | -                     | 641.59   | -        | 233.5    | -        | -        | -       | -        | 157.85  | 134.90  |
| 2488          | 2482 | 47.04 | Dodecanoic acid        | 741.97                | 865.76   | -        | 989.29   | -        | 3228.94  | 180.33  | 2289.33  | 264.04  | 555.35  |
| Total content |      |       |                        | 40567.87              | 23110.31 | 34268.44 | 10825.61 | 35728.54 | 22761.24 | 7464.57 | 20969.38 | 11266.8 | 6210.89 |
| Alcohols      |      |       |                        |                       |          |          |          |          |          |         |          |         |         |
| 946           | 947  | 5.33  | Ethanol                | 44.32                 | 64.48    | 83.68    | 96.64    | 201.92   | 34.32    | 39.12   | 60.24    | 108.56  | 63.2    |
| 1102          | 1093 | 10.02 | 2-Methylpropanol       | -                     | 0.55     | -        | -        | -        | 1.61     | -       | 2.85     | 0.46    | 2.48    |
| 1211          | 1206 | 17.86 | 3-methyl butanol       | -                     | 2.61     | -        | -        | -        | 24.1     | -       | 47.03    | 35.42   | 161.2   |
| 1253          | 1252 | 18.79 | Pentanol               | 2.514.00              | 5.96     | 28.64    | 29.34    | 200.59   | 3.75     | 8.17    | -        | -       | -       |
| 1322          | 1318 | 17.46 | 2-Heptanol             | 2.98                  | -        | 6.18     | -        | -        | -        | 0.12    | -        | -       | 0.12    |
| 1354          | 1353 | 15.77 | Hexanol                | 7.02                  | 1.10     | -        | 18.53    | 51.35    | 0.16     | -       | -        | -       | 69.44   |
| 1486          | 1473 | 23.57 | 2-ethyl-n-hexanol      | -                     | -        | -        | -        | 48.22    | 40.92    | 21.06   | -        | -       | -       |

|                      |      |        |                      |        |        |        |        |        |        |           |        |        |        |
|----------------------|------|--------|----------------------|--------|--------|--------|--------|--------|--------|-----------|--------|--------|--------|
| 1518                 | -    | 24.79  | 2-Nonanol            | 5.64   | -      | -      | -      | 7.88   | -      | 39.44     | -      | -      | 13.52  |
| 1556                 | 1554 | 26.34  | 1-Octanol            | 10.31  | 0.27   | 16.15  | 18.26  | 16.15  | 1.18   | 44.85     | 135.66 | 259.58 | 14.88  |
| 1572                 | 1578 | 39.32  | 2,3-Butanediol       | -      | 0.41   | 14.86  | -      | 14.86  | 9.31   | -         | 423.51 | -      | 24.8   |
| 1652                 | 1659 | 28.56  | Furfural alcohol     | -      | -      | 3.58   | -      | 5.09   | -      | -         | -      | 139.16 | 17.36  |
| 1862                 | 1872 | 34.15  | Benzenemethanol      | 17.70  | 8.70   | 21.90  | 17.70  | 95.40  | 24.15  | 3.90      | 3.60   | 5.85   | 4.35   |
| 1896                 | 1903 | 38.89  | Benzenethanol        | 17.69  | 3.58   | 68.76  | 4.32   | 68.76  | 3.93   | 95.45     | 17.73  | 5.91   | 45.21  |
| 1347                 | -    | 19.02  | 3-Dimethyltridecanol | -      | -      | -      | -      | -      | -      | -         | -      | 26.73  | -      |
| 1054                 | 1045 | 9.56   | 1-Propanol           | -      | 0.27   | -      | -      | -      | -      | -         | -      | -      | -      |
| 1658                 | 1653 | 30.305 | 1-Nonanol            | 18.75  | 1.00   | 3.98   | -      | -      | -      | 407.41    | 1.43   | -      | -      |
| 1450                 | 1457 | 27.025 | 1-Heptanol           | 17.92  | -      | 6.18   | 19.6   | 19.80  | -      | 26.51     | 3.99   | -      | -      |
| 1760                 | -    | 33.76  | 1-Decanethiol        | -      | -      | -      | 1.4    | -      | -      | -         | -      | -      | -      |
| 1445                 | 1445 | 21.52  | 1-Octen-3-ol         | -      | -      | -      | 10.64  | -      | -      | -         | -      | -      | -      |
| <b>Total content</b> |      |        |                      | 206.84 | 70.3   | 238.35 | 176.67 | 608.81 | 109.79 | 1020.3193 | 709.59 | 647.1  | 649.79 |
| <b>Ketones</b>       |      |        |                      |        |        |        |        |        |        |           |        |        |        |
| 1000                 | -    | 10.49  | 2,3-Butanedione      | 15.6   | -      | -      | -      | 44.7   | 31.2   | 33.3      | -      | -      | -      |
| 1180                 | 1180 | 12.537 | 2-Heptanone          | 51.58  | 36.29  | 36.29  | -      | 98.71  | 26.60  | 472.40    | 9.43   | 55.56  | 272.69 |
| 1276                 | 1286 | 18.53  | 3-Hydroxy-2-butanone | 624.40 | 12.74  | 37.80  | -      | -      | 214.62 | 187.32    | 68.74  | -      | 0.28   |
| 1384                 | 1386 | 19.55  | 2-Nonanone           | -      | 193.20 | -      | 159.60 | 571.20 | -      | 159.60    | -      | 46.20  | -      |
| 1590                 | 1596 | 27.72  | 2-Undecanone         | 3.28   | 9.02   | 19.68  | 18.86  | 177.12 | 43.46  | 4.10      | 9.02   | 20.50  | 7.38   |
| 1800                 | 1808 | 34.23  | 2-Tridecone          | -      | 27.84  | -      | 3.11   | -      | -      | -         | 5.125  | 11.07  | -      |
| 2011                 | 2015 | 40.23  | 2-Pentadecanone      | -      | 42.49  | -      | -      | -      | -      | -         | 1.44   | 2.05   | 42.24  |
| 901                  | 900  | 9.72   | 2-Butanone           | 3.276  | -      | -      | -      | -      | -      | -         | -      | 6.36   | -      |
| 998                  | 978  | 10.34  | 2-Pentanone          | -      | -      | -      | -      | -      | -      | 83.24     | -      | 1.64   | -      |
| 814                  | 792  | 8.31   | Acetone              | -      | -      | -      | 21.28  | -      | -      | -         | -      | 9.43   | -      |
| 1284                 | -    | 18.75  | Nonanone             | 159.3  | -      | 195.07 |        | -      | -      | 569.11    | -      | 48.18  | -      |
| 2012                 | -    | 40.42  | 2-Decanone           | -      | -      | -      | 3.36   | -      | -      | -         | -      | -      | -      |

|      |      |       |                                      |         |         |        |        |          |        |         |        |        |         |
|------|------|-------|--------------------------------------|---------|---------|--------|--------|----------|--------|---------|--------|--------|---------|
|      |      |       | <b>Total content</b>                 | 388.82  | 231.18  | 355.92 | 44.98  | 155.89   | 267.51 | 1301.54 | 691.4  | 154.71 | 1731.57 |
|      |      |       | <b>Aldehydes</b>                     |         |         |        |        |          |        |         |        |        |         |
| 678  | 692  | 3.54  | Acetaldehyde                         | -       | 14.42   | -      | -      | -        | 0.80   | -       | 312.16 | -      | 637.23  |
| 1086 | 1081 | 9.27  | Hexanal                              | 51      | 3.5     | -      | -      | -        | 93.00  | 1.00    | 0.50   | 46.50  | 110.00  |
| 1284 | 1287 | 16.19 | Octanal                              | 6.795   | -       | 44.28  | -      | -        | 5.67   | -       | -      | -      | -       |
| 1388 | 1392 | 19.66 | Nonanal                              | -       | 36.54   | 44.52  | 45.36  | 407.40   | 9.24   | 8.82    | 2.52   | -      | 128.52  |
| 1448 | 1447 | 22.13 | Furfural                             | 7.59    | 3.58    | -      | -      | -        | 8.79   | 2.38    | 2.38   | 9.91   | 6.64    |
| 1506 | 1513 | 24.46 | Benzaldehyde                         | 50.94   | 43.98   | 40.14  | 68.25  | 60.69    | 34.05  | 17.52   | 5.19   | 32.07  | 57.00   |
| 1524 | 1532 | 24.99 | 2-Nonenal                            | 7.59    | -       | -      | -      | -        | 11.93  | -       | -      | -      | -       |
| 917  | 914  | 5.01  | 3-Methylbutyraldehyde                | -       | -       | -      | 6.91   | -        | 8.49   | -       | 8.67   | 7.5    | -       |
| 1524 | -    | 25.24 | Decenal                              | -       | 0.640   | 0.64   | -      | -        | 1.59   | -       | -      | -      | -       |
|      |      |       | <b>Total content</b>                 | 123.29  | 25.34   | 152.57 | 372.37 | 139.3    | 40.37  | 468.11  | 437.89 | 95.96  | 2394.56 |
|      |      |       | <b>Esters</b>                        |         |         |        |        |          |        |         |        |        |         |
| 886  | 885  | 6.22  | Ethyl acetate                        | 57.38   | 618.26  | 493.62 | 752.4  | 31133.78 | 947.34 | 1423.86 | 318.82 | 82.08  | 839.04  |
| 1234 | 1232 | 16.01 | Ethyl caproate                       | 200.46  | 111.6   | 11.16  | 14.13  | 240.65   | 25.32  | 245.18  | 2.17   | 2.36   | 18.69   |
| 1430 | 1429 | 21.31 | Ethyl octanoate                      | 800.05  | 1538.88 | 91.61  | -      | 588.48   | -      | 883.56  | 8.17   | 23.41  | 43.50   |
| 1535 | -    | 22.91 | 2-Hydroxy-propionic acid butyl ester | -       | -       | -      | -      | -        | -      | -       | -      | -      | 4.4     |
| 1633 | 1631 | 41.72 | Ethyl decanoate                      | 5.40    | 36.00   | 221.40 | -      | 388.80   | 5.40   | 14.40   | 498.60 | 5.40   | -       |
| 2046 | -    | 40.99 | Ethyl myristate                      | -       | 52.08   | -      | 0.59   | -        | 1.47   | -       | 0.19   | 0.27   | 4.40    |
| 1007 | 978  | 9.16  | Methyl butyrate                      | -       | -       | -      | -      | -        | 3.83   | -       | -      | 0.49   | -       |
| 1048 | 1028 | 13.44 | Ethyl butyrate                       | 0.82    | -       | -      | -      | -        | -      | 15.83   | 13.42  | 2.07   | -       |
| 1187 | 1187 | 15.26 | Methyl caproate                      | -       | 1.58    | -      | 3.53   | -        | 6.77   | -       | -      | 1.76   | -       |
| 1125 | 1124 | 14.89 | 3-Methyl-1-butanol acetate           | -       | -       | -      | -      | -        | -      | -       | 0.43   | -      | -       |
|      |      |       | <b>Total content</b>                 | 1018.31 | 2224.47 | 144.76 | 37.68  | 1096.89  | 100.82 | 2238.92 | 18.89  | 38.21  | 234.83  |
|      |      |       | <b>Sulfur compounds</b>              | -       | -       | -      | -      | -        | -      | -       | -      | -      | -       |
| 1074 | -    | 14.32 | Dimethyl disulfide                   | 0.04    | -       | -      | -      | -        | 0.05   | 0.04    | -      | 0.02   | -       |

|                      |      |       |                     |   |      |        |        |        |        |        |        |        |        |
|----------------------|------|-------|---------------------|---|------|--------|--------|--------|--------|--------|--------|--------|--------|
| 1367                 | -    | 35.26 | Dimethyl trisulfide | - | -    | -      | -      | -      | 0.1    | -      | -      | -      | -      |
| 1876                 | 1880 | 36.23 | Dimethyl sulfone    | - | -    | -      | -      | -      | 0.02   | -      | -      | -      | 0.04   |
| 690                  | -    | 4.23  | Methyl mercaptan    | - | -    | -      | -      | -      | -      | -      | -      | 7.65   | -      |
| <b>Total content</b> |      |       |                     | - | -    | -      | 0.15   | -      | 0.06   | -      | 0.04   | 7.10   | 0.19   |
| <b>Olefins</b>       |      |       |                     |   |      |        |        |        |        |        |        |        |        |
| 1106                 | -    | 14.67 | β-Pine terpene      | - | -    | -      | -      | -      | 0.03   | -      | -      | -      | 0.02   |
| 1194                 | 1192 | 15.43 | Limonene            | - | 0.69 | -      | 36.25  | -      | 0.16   | -      | 0.06   | 0.30   | 0.12   |
| 1250                 | 1265 | 15.01 | Styrene             | - | -    | 4.22   | -      | 58.87  | 3.17   | -      | 1.85   | -      | 26.93  |
| <b>Total content</b> |      |       |                     | - | 2.53 | -      | 63.22  | 42.43  | 0.19   | 58.88  | 0.06   | 0.30   | 0.28   |
| <b>Aromatic</b>      |      |       |                     |   |      |        |        |        |        |        |        |        |        |
| 1046                 | 1049 | 7.847 | Toluene             | - | 1.38 | 445.61 | 181.62 | 409.29 | 520.2  | 525.20 | 178.37 | 180.60 | 516.20 |
| 1992                 | 1996 | 39.24 | Phenol              | - | -    | -      | 181.60 | -      | 49.06  | -      | 49.55  | 17.59  | 14.00  |
| 2071                 | 2079 | 41.43 | 4-Methylphenol      | - | -    | -      | 102.15 | -      | -      | -      | 79.28  | 17.57  | 19.00  |
| <b>Total content</b> |      |       |                     | - | 1.38 | 445.61 | 465.37 | 409.29 | 569.26 | 525.2  | 307.2  | 215.76 | 549.2  |
| <b>Heterocycles</b>  |      |       |                     |   |      |        |        |        |        |        |        |        |        |
| 1230                 | 1231 | 14.78 | Furan,2-pentyl-     | - | 0.23 | -      | 0.97   | -      | -      | -      | -      | -      | 0.26   |
| <b>Total content</b> |      |       |                     | - | 0.23 | -      | 0.97   | -      | -      | -      | -      | -      | 0.26   |

Table S2 Correlation coefficient r.

| Label               | <i>Lactobacillus<br/>delbrueckii</i> | <i>Lactobacillus<br/>psittaci</i> | <i>Lactococcus<br/>lactis</i> | <i>Leuconostoc<br/>mesenteroides</i> | <i>Lactobacillus<br/>helveticus</i> | <i>Lactobacillus<br/>crispatus</i> | <i>Lactobacillus<br/>paracasei</i> | <i>Lactobacillus<br/>amylovorus</i> | <i>Leuconostoc<br/>pseudomesenteroides</i> | <i>Leuconostoc<br/>citreum</i> |
|---------------------|--------------------------------------|-----------------------------------|-------------------------------|--------------------------------------|-------------------------------------|------------------------------------|------------------------------------|-------------------------------------|--------------------------------------------|--------------------------------|
| hexanal             | 0.19754                              | -0.15802                          | -0.46014                      | -0.16304                             | 0.45742                             | -0.41569                           | 0.0286                             | -0.04341                            | -0.08079                                   | 0.54541                        |
| octanal             | 0.25109                              | -0.3892                           | -0.49905                      | 0.50816                              | -0.5385                             | -0.25674                           | -0.25674                           | -0.53695                            | 0.17815                                    | 0.44493                        |
| nonanal             | -0.10543                             | 0.36649                           | 0.44623                       | -0.08521                             | 0.04494                             | -0.22275                           | -0.24876                           | 0.18309                             | 0.57247                                    | 0.17415                        |
| furfural            | -0.20899                             | -0.38095                          | -0.75695                      | -0.05352                             | 0.3517                              | -0.38453                           | 0.5274                             | -0.45467                            | -0.35069                                   | 0.5068                         |
| benzaldehyde        | 0.1733                               | -0.26507                          | 0.43951                       | -0.12982                             | -0.00943                            | -0.71127                           | -0.294                             | -0.33471                            | 0.87523                                    | 0.68555                        |
| 2-nonenal           | 0.11389                              | -0.33394                          | -0.65046                      | 0.29058                              | -0.43538                            | -0.2497                            | -0.2497                            | -0.33846                            | -0.05927                                   | 0.40077                        |
| ethyl acetate       | -0.23372                             | 0.39289                           | 0.31975                       | 0.05712                              | -0.11728                            | -0.13735                           | -0.18868                           | 0.10271                             | 0.49659                                    | 0.10681                        |
| methyl hexanoate    | 0.34999                              | 0.70299                           | 0.18119                       | 0.1977                               | 0.36446                             | 0.85541                            | 0.00627                            | 0.73702                             | -0.42862                                   | -0.79028                       |
| ethyl butyrate      | 0.24025                              | 0.64837                           | 0.096                         | 0.42986                              | -0.05768                            | 0.99132                            | -0.0458                            | 0.58686                             | -0.46195                                   | -0.92507                       |
| ethyl hexanoate     | -0.21571                             | 0.41904                           | 0.32191                       | 0.05595                              | -0.12265                            | -0.1002                            | -0.21584                           | 0.14916                             | 0.47128                                    | 0.06886                        |
| ethyl octanoate     | -0.27522                             | 0.30324                           | 0.35122                       | 0.00342                              | -0.1421                             | -0.19391                           | -0.16138                           | 0.03632                             | 0.51768                                    | 0.13598                        |
| ethyl decanoate     | -0.25438                             | 0.33413                           | 0.35108                       | 0.02892                              | -0.15558                            | -0.15593                           | -0.18363                           | 0.06542                             | 0.50706                                    | 0.10436                        |
| dimethyl disulfide  | 0.11645                              | 0.09639                           | -0.67622                      | 0.59855                              | -0.35093                            | 0.37342                            | -0.02872                           | -0.07803                            | -0.41591                                   | -0.16314                       |
| dimethyl trisulfide | -0.14037                             | -0.14885                          | -0.70828                      | -0.14422                             | -0.14386                            | -0.16667                           | -0.16667                           | 0.07925                             | -0.4257                                    | 0.21442                        |
| methyl mercaptan    | -0.7718                              | 0.03625                           | -0.50434                      | -0.16183                             | 0.59921                             | -0.16667                           | 1                                  | -0.31745                            | -0.4257                                    | 0.18244                        |
| styrene             | -0.04388                             | 0.40718                           | 0.40345                       | -0.08671                             | 0.15611                             | -0.24775                           | -0.24775                           | 0.2219                              | 0.56954                                    | 0.22957                        |
| acetic acid         | 0.00445                              | -0.64164                          | 0.48895                       | -0.533                               | -0.33617                            | -0.10214                           | -0.1732                            | -0.09393                            | 0.00672                                    | -0.18273                       |
| butanoic acid       | 0.30289                              | 0.07812                           | 0.25492                       | 0.27696                              | -0.72549                            | 0.04927                            | -0.7883                            | 0.12374                             | 0.43919                                    | -0.04623                       |
| hexanoic acid       | 0.54131                              | -0.47689                          | 0.6363                        | 0.09882                              | -0.59662                            | 0.19579                            | -0.44692                           | -0.15641                            | 0.29117                                    | -0.31483                       |
| octanoic acid       | -0.04555                             | -0.56909                          | -0.16748                      | 0.41866                              | -0.36491                            | -0.27389                           | 0.30262                            | -0.88995                            | 0.25674                                    | 0.35374                        |
| capric acid         | 0.1333                               | 0.03286                           | -0.65985                      | 0.35944                              | -0.33446                            | 0.37103                            | -0.14743                           | 0.09866                             | -0.54845                                   | -0.22647                       |

|                      |          |          |          |          |          |          |          |          |          |          |
|----------------------|----------|----------|----------|----------|----------|----------|----------|----------|----------|----------|
| decanoic acid        | -0.05137 | 0.12288  | -0.03862 | -0.37653 | 0.9221   | -0.2517  | 0.45899  | 0.11744  | -0.08558 | 0.27677  |
| ethanol              | -0.51497 | 0.30077  | 0.23909  | -0.12018 | 0.17286  | -0.29871 | 0.21603  | -0.06609 | 0.4053   | 0.23643  |
| phenylethanol        | -0.24605 | 0.26562  | 0.17759  | 0.10842  | -0.24012 | -0.25442 | -0.22826 | -0.03842 | 0.52304  | 0.24885  |
| pentanol             | -0.23912 | 0.37603  | 0.32361  | 0.06753  | -0.14201 | -0.13835 | -0.18663 | 0.08057  | 0.50376  | 0.1057   |
| 2-ethyl-n-hexanol    | -0.19863 | 0.45219  | -0.18809 | 0.09846  | -0.24485 | 0.11041  | -0.32675 | 0.35653  | -0.02871 | -0.08052 |
| 2-butanone           | -0.53291 | -0.13251 | -0.48385 | 0.20275  | 0.31611  | -0.24149 | 0.87404  | -0.65119 | -0.12747 | 0.34736  |
| 2,3-butanedione      | 0.02857  | 0.56957  | -0.05826 | 0.46446  | -0.43254 | 0.36477  | -0.42035 | 0.32373  | 0.08803  | -0.26689 |
| 3-hydroxy-2-butanone | 0.47411  | -0.21577 | -0.19464 | 0.80639  | -0.62581 | 0.07453  | -0.28491 | -0.49801 | 0.3014   | 0.14189  |
| 2-nonanone           | -0.24583 | 0.33946  | 0.48704  | -0.0357  | -0.21817 | 0.04477  | -0.19697 | 0.18845  | 0.3772   | -0.16019 |
| 2-undecanone         | -0.36204 | 0.33711  | 0.12592  | -0.01359 | -0.09074 | -0.2361  | -0.12133 | 0.06025  | 0.39186  | 0.20982  |

---
